# Supplementary material for: Analysis of Structure Variations and Expression Characteristics of DMP8 and DMP9 Genes in Brassicaceae
Source: MDPI journal article supplement (doi:10.3390/horticulturae8111095), 2022-11-21
Supplement: s1 [file s1]

## Supplementary Data

# Analysis of structure variations and expression characteristics of *DMP8* and *DMP9* genes in Brassicaceae

Tingting Zhang†, Jianli Liang†, Xu Cai, Lei Zhang, Jian Wu\* and Xiaowu Wang\*

Institute of Vegetables and Flowers, Chinese Academy of Agricultural Sciences, Zhongguancun Nan Da Jie No.12, Haidian District, Beijing 100081, China.

\* Correspondence: Address correspondence to wujian@caas.cn (J.W.); [wangxiaowu@caas.cn](mailto:wangxiaowu@caas.cn) (X.W.)

† These authors contributed equally to this work.

**Citation:** Zhang, T.; Liang, J.; Cai, X.; Zhang, L.; Wu, J.; Wang, X. Analysis of Structure Variations and Expression Characteristics of *DMP8* and *DMP9* Genes in Brassicaceae. *Horticulturae* **2022**, *8*, 1095. <https://doi.org/10.3390/horticulturae8111095>

Academic Editor(s): Jose V. Die

Received: 20 October 2022

Accepted: 17 November 2022

Published: 21 November 2022

**Publisher's Note:** MDPI stays neutral with regard to jurisdictional claims in published maps and institutional affiliations.

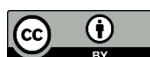

**Copyright:** © 2022 by the authors. Submitted for possible open access publication under the terms and conditions of the Creative Commons Attribution (CC BY) license (<https://creativecommons.org/licenses/by/4.0/>).

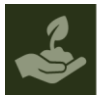**Table S1.** List of DMP8 and DMP9 homologous genes in the 26 Brassicaceae species.

| Species                        | Gene ID                               | Gene Name    | Score | Query Cover | E value                 | Identity | Genomic Block | Reference       |
|--------------------------------|---------------------------------------|--------------|-------|-------------|-------------------------|----------|---------------|-----------------|
| <i>Arabidopsis thaliana</i>    | AT1G09157                             | AtDMP8       | 732   | 100%        | 0                       | 100%     | A             | [44]            |
| <i>Arabidopsis lyrata</i>      | AL1G19610                             | AralyDMP8    | 592   | 94%         | 0                       | 93.60%   | A             | [45]            |
| <i>Arabidopsis thaliana</i>    | AT5G39650                             | AtDMP9       | 1069  | 100%        | 0                       | 100%     | S             | [44]            |
| <i>Boechera retrofracta</i>    | BOERETT00014525                       | BoereDMP9.1  | 558   | 99%         | 0                       | 94%      | S             | [46]            |
| <i>Boechera retrofracta</i>    | segment                               | BoereDMP9.2* | 425   | 95%         | $9.88 \times 10^{-163}$ | 88%      | unknown       | [46]            |
| <i>Boechera stricta</i>        | Bostr.10058s0037                      | BoestDMP9    | 562   | 99%         | 0                       | 94.20%   | S             | [47]            |
| <i>Crucihimalaya himaliaca</i> | Crahi.1009s0009                       | CruhiDMP9.1  | 379   | 99%         | 0                       | 87.90%   | S             | [48]            |
| <i>Crucihimalaya himaliaca</i> | Crahi.0009s0062                       | CruhiDMP9.2  | 327   | 97%         | $7.53 \times 10^{-85}$  | 86%      | R             | [48]            |
| <i>Capsella grandiflora</i>    | Cagra.5525s0001                       | CapgrDMP9.1  | 443   | 92%         | 0                       | 91.30%   | S             | (phytozome V12) |
| <i>Capsella grandiflora</i>    | Cagra.0003s0010                       | CapgrDMP9.2* | 402   | 98%         | 0                       | 88.50%   | unknown       | (phytozome V12) |
| <i>Capsella rubella</i>        | Carubv10007365m.g                     | CapruDMP9.1  | 533   | 92%         | 0                       | 90.60%   | S             | [49]            |
| <i>Capsella rubella</i>        | Carubv10019490m.g                     | CapruDMP9.2* | 399   | 99%         | 0                       | 86.30%   | unknown       | [49]            |
| <i>Camelina sativa</i>         | Csa10g046920.1                        | CamsaDMP9.1  | 559   | 99%         | 0                       | 92.20%   | S             | [50]            |
| <i>Camelina sativa</i>         | Csa12g081800.1                        | CamsaDMP9.2  | 584   | 99%         | 0                       | 91.90%   | S             | [50]            |
| <i>Arabidopsis lyrata</i>      | AL7G50660                             | AralyDMP9    | 846   | 99%         | 0                       | 96.60%   | S             | [45]            |
| <i>Arabidopsis halleri</i>     | Araha.5030s0001                       | ArahaDMP9*   | 633   | 99%         | 0                       | 96.60%   | unknown       | [51]            |
| <i>Descurainia sophia</i>      | Desop.0231s0593                       | DessoDMP9.1  | 558   | 99%         | 0                       | 93.50%   | S             | (phytozome V12) |
| <i>Descurainia sophia</i>      | Desop.0229s0263                       | DessoDMP9.2* | 444   | 96%         | $5.93 \times 10^{-129}$ | 89.40%   | unknown       | (phytozome V12) |
| <i>Cardamine hirsuta</i>       | CARHR262660.1                         | CarhiDMP9.1  | 609   | 100%        | 0                       | 91.60%   | S             | [52]            |
| <i>Cardamine hirsuta</i>       | CARHR017530                           | CarhiDMP9.2* | 728   | 99%         | 0                       | 90.20%   | unknown       | [52]            |
| <i>Leavenworthia</i>           | LA_scaffold3215_7.Mrna<br>1 alabamica | LeaalDMP9    | 413   | 99%         | 0                       | 89.10%   | S             | [53]            |
| <i>Brassica rapa</i>           | BraA04g012030.3C                      | BraDMP9.1    | 523   | 99%         | 0                       | 91.80%   | S             | [54]            |
| <i>Brassica rapa</i>           | BraA03g003970.3C                      | BraDMP9.2    | 458   | 99%         | 0                       | 86.10%   | R             | [54]            |
| <i>Brassica oleracea</i>       | BolC04g044930.2J                      | BraolDMP9.1  | 442   | 99%         | 0                       | 89.80%   | S             | [55]            |
| <i>Brassica oleracea</i>       | BolC03g004320.2J                      | BraolDMP9.2  | 428   | 99%         | $1.24 \times 10^{-179}$ | 85.90%   | R             | [55]            |
| <i>Brassica nigra</i>          | BniB006273                            | BraniDMP9.1  | 518   | 99%         | 0                       | 90.40%   | S             | [56]            |
| <i>Brassica nigra</i>          | BniB028978                            | BraniDMP9.2  | 453   | 99%         | 0                       | 87.40%   | R             | [56]            |
| <i>Brassica juncea</i>         | BjuVA04G12740                         | BrajuDMP9.1  | 515   | 99%         | 0                       | 91.50%   | S             | [57]            |
| <i>Brassica juncea</i>         | BjuVA03G03890                         | BrajuDMP9.3  | 532   | 99%         | 0                       | 91%      | R             | [57]            |
| <i>Brassica juncea</i>         | BjuVB01G23230                         | BrajuDMP9.2  | 457   | 99%         | 0                       | 87.50%   | S             | [57]            |
| <i>Brassica juncea</i>         | BjuVB08G02530                         | BrajuDMP9.4  | 444   | 99%         | $7.04 \times 10^{-170}$ | 86.30%   | R             | [57]            |
| <i>Brassica napus</i>          | A04p12360.1_BnaDAR                    | BranaDMP9.1  | 513   | 99%         | 0                       | 91.50%   | S             | [58]            |
| <i>Brassica napus</i>          | C04p46030.1_BnaDAR                    | BranaDMP9.2  | 482   | 99%         | 0                       | 89.90%   | S             | [58]            |
| <i>Brassica napus</i>          | A03p04210.1_BnaDAR                    | BranaDMP9.3  | 420   | 99%         | 0                       | 86.10%   | R             | [58]            |
| <i>Brassica napus</i>          | segment                               | BranaDMP9.4* | 463   | 99%         | $4.96 \times 10^{-177}$ | 85.70%   | R             | [58]            |
| <i>Brassica carinata</i>       | BcaB06g27350                          | BracaDMP9.1  | 477   | 99%         | 0                       | 91%      | S             | [59]            |
| <i>Brassica carinata</i>       | BcaB01g05665                          | BracaDMP9.2  | 680.4 | 99%         | 0                       | 86.80%   | R             | [59]            |

|                                |                               |                     |       |     |                         |        |         |                                                                             |
|--------------------------------|-------------------------------|---------------------|-------|-----|-------------------------|--------|---------|-----------------------------------------------------------------------------|
| <i>Brassica carinata</i>       | <i>BcaB01g05567</i>           | <i>BracaDMP9.4*</i> | 632.9 | 99% | $2.40 \times 10^{-179}$ | 85.90% | unknown | [59]                                                                        |
| <i>Brassica carinata</i>       | <i>BcaB01g05666</i>           | <i>BracaDMP9.3</i>  | 535.7 | 99% | $4.17 \times 10^{-150}$ | 87.90% | R       | [59]                                                                        |
| <i>Raphanus sativus</i>        | <i>Rsa10036334</i>            | <i>RapsaDMP9</i>    | 391   | 99% | 0                       | 87%    | R       | [60]                                                                        |
| <i>Sisymbrium irio</i>         | <i>SI_scaffold522_13.mRNA</i> | <i>SisirDMP9.1</i>  | 417   | 99% | 0                       | 88.70% | S       | [53]                                                                        |
|                                | <i>1</i>                      |                     |       |     |                         |        |         |                                                                             |
| <i>Sisymbrium irio</i>         | <i>SI_scaffold2429_21.CDS</i> | <i>SisirDMP9.2*</i> | 414   | 96% | 0                       | 89.70% | unknown | [53]                                                                        |
|                                | <i>1</i>                      |                     |       |     |                         |        |         |                                                                             |
| <i>Isatis indigotica</i>       | <i>Iin20258</i>               | <i>IsainDMP9.1</i>  | 682   | 99% | s                       | 91.10% | S       | [61]                                                                        |
| <i>Isatis indigotica</i>       | <i>Iin04615</i>               | <i>IsainDMP9.2</i>  | 594   | 99% | 0                       | 90.60% | unknown | [61]                                                                        |
| <i>Arabis alpina</i>           | <i>AALP_AA8G309600</i>        | <i>AraalDMP9.1</i>  | 918.3 | 99% | 0                       | 90.90% | unknown | [62]                                                                        |
| <i>Arabis alpina</i>           | <i>AALP_AA8G092900</i>        | <i>AraalDMP9.2</i>  | 749.8 | 99% | 0                       | 87.70% | unknown | [62]                                                                        |
| <i>Schrenkiella parvula</i>    | segment                       | <i>SchpaDMP9.1*</i> | 1227  | 99% | 0                       | 91.80% | unknown | <a href="http://thellungiella.org/data/">http://thellungiella.org/data/</a> |
| <i>Schrenkiella parvula</i>    | segment                       | <i>SchpaDMP9.2*</i> | 1146  | 95% | 0                       | 89.80% | unknown | <a href="http://thellungiella.org/data/">http://thellungiella.org/data/</a> |
| <i>Thlaspi arvense</i>         | <i>Thlar.0083s0037</i>        | <i>ThlarDMP9.1</i>  | 473   | 99% | 0                       | 91.40% | S       | [63]                                                                        |
| <i>Thlaspi arvense</i>         | <i>Thlar.0017s0278</i>        | <i>ThlarDMP9.2</i>  | 440   | 99% | 0                       | 89.50% | unknown | [63]                                                                        |
| <i>Thellungiella halophila</i> | <i>Thhalv10027899m.g</i>      | <i>ThehaDMP9.1</i>  | 738   | 99% | 0                       | 91.20% | S       | [64]                                                                        |
| <i>Thellungiella halophila</i> | <i>Thhalv10014525m.g</i>      | <i>ThehaDMP9.2</i>  | 921   | 97% | 0                       | 89.60% | unknown | [64]                                                                        |
| <i>Aethionema arabicum</i>     | <i>AA_scaffold5916_18</i>     | <i>AetarDMP9</i>    | 448.4 | 83% | $1.38 \times 10^{-124}$ | 85.30% | S       | [53]                                                                        |

Notes: Asterisk (\*) indicates non-syntenic genes or segments.
